# Supplementary material for: One-pot analysis of enantiomeric excess of free amino acids by electrospray ionization mass spectrometry
Source: Royal Society of Chemistry journal article supplement (doi:10.1039/d1ra06542d), 2021-01-01
Supplement: d1ra06542d1.pdf [file d1ra06542d1.pdf]

## Electronic Supporting Information (ESI) for

### One-pot analysis of enantiomeric excess of free amino acids by electrospray ionization mass spectrometry

Takashi Nakakoji,<sup>a</sup> Hirofumi Sato,<sup>b</sup> Daisuke Ono,<sup>b</sup> Hiroyuki Miyake,<sup>\*a</sup> Eiko Mieda,<sup>a</sup> Satoshi Shinoda,<sup>a</sup> Hiroshi Tsukube,<sup>a</sup> Hideya Kawasaki,<sup>c</sup> Ryuichi Arakawa,<sup>c</sup> and Motohiro Shizuma<sup>\*b</sup>

<sup>a</sup> Department of Chemistry, Graduate School of Science, Osaka City University, Sugimoto, Sumiyoshi-ku, Osaka 558-8585, Japan

<sup>b</sup> Osaka Research Institute of Industrial Science and Technology, Morinomiya, Joto-ku, Osaka 536-8553, Japan

<sup>c</sup> Department of Chemistry and Materials Engineering, Faculty of Chemistry, Materials and Bioengineering, Kansai University, Yamate-cho, Suita, Osaka 564-8680, Japan

#### Contents of SI

1. General and materials
2. Synthesis of *R,R-L-d*<sub>6</sub>
3. Mass spectrometry
4. Sample preparation
5. References
6. Figures

**Figure S1.** <sup>1</sup>H-NMR spectrum of *R,R-L-d*<sub>6</sub>

**Figure S2.** High resolution (HR) mass spectrum of *R,R-L-d*<sub>6</sub>

**Figure S3.** CD spectra of Cu<sup>II</sup>/*S,S-L* and Cu<sup>II</sup>/*R,R-L-d*<sub>6</sub> in methanol

**Figure S4.** Formation of three-component complexes in a system of CuCl<sub>2</sub>/*S,S-L/R,R-L-d*<sub>6</sub>/*S-AA/R-AA*.

**Figure S5.** Correlation between *Ie* values of [Cu<sup>II</sup>(*S,S-L*)(Phe – H)]<sup>+</sup> and [Cu<sup>II</sup>(*R,R-L-d*<sub>6</sub>)(Phe – H)]<sup>+</sup> in mass spectra using S90–100 % *ee* of Phe.

**Figures S6 and S7.** ESI mass spectra of CuCl<sub>2</sub>/*S,S-L/R,R-L-d*<sub>6</sub>/*S-AA* in water/methanol

**Figure S8.** Enantioselective three-component complexation equilibrium system and plots of the calculated concentration ratio of the diastereomeric complex ions, [Cu<sup>II</sup>(*S,S-L*)(*S-AA* – H)]<sup>+</sup>/[Cu<sup>II</sup>(*R,R-L1*)(*S-AA* – H)]<sup>+</sup>, in solution (line) versus the initial concentration of [*AA*]<sub>0</sub> in solution.

**Figure S9.** *Ie* (%) value of the simultaneous analysis against equivalent mole of AAs for CuCl<sub>2</sub> and ligands (*S,S-L, R,R-L-d*<sub>6</sub>).

**Figure S10.** Mass spectra of a mixture of Cu<sup>II</sup>/*S,S-L/R,R-L-d*<sub>6</sub>/*AA*.

## 1. General and Materials

**General.**  $^1\text{H-NMR}$  (270 MHz) and  $^{13}\text{C-NMR}$  (67.5 MHz) spectra were measured with a JEOL JNM EX-270. Tetramethyl silane (TMS,  $\delta$  0 ppm) was used as the internal standard in  $\text{CDCl}_3$ . High resolution mass spectra (ESI, positive ion mode) were measured with a JEOL AccuTOF LC-plus 4G mass spectrometer and JEOL YOKUDELNA ion peak  $[\text{M} + \text{Na}]^+$  ( $m/z$  430.9141952) was used as an internal standard for mass calibration. IR spectra were measured with a HORIBA FT-IR 730 in the range of 650–4000  $\text{cm}^{-1}$ . Circular dichroism (CD) spectra were measured in the range of 230–400 nm in 1 cm quartz cuvette with a Jasco J-820. Elemental analysis was measured with a CE INSTRUMENTS EA-1110 CHNS-O. Melting point was measured with a SEIKO DSC SSC/5200. Optical rotation was measured on a Jasco P-1020 with a 10 cm quartz cuvette irradiated with sodium D line. TLC was performed by using a Merck TLC Silica gel 60 F<sub>254</sub> 25 Glass plates detected by iodine as indicator.

**Materials.** Chiral tetradentate  $N,N'$ -ethylene-bis( $N$ -methyl- $S$ -alanine methyl amide) ( $S,S$ -**L**) and  $N,N'$ -ethylene-bis( $N$ -methyl- $R$ -alanine methyl ester) ( $R,R$ -**L-OMe**) were synthesized according to previous reports.<sup>S1–S3</sup> The synthesized compounds were purified by column chromatography using NH silica gel (Fuji silysia chemical, LTD.) as the stationary phase. Methanol for synthesis was distilled over quicklime as a desiccant.

LC/MS grade methanol (Fujifilm Wako pure chem. Co.) was purchased and used for ESI-MS. All other reagents containing metal salts and amino acids were purchased from commercial suppliers and used without further purification.

## 2. Synthesis of $R,R$ -**L-*d*<sub>6</sub>**<sup>S4</sup>

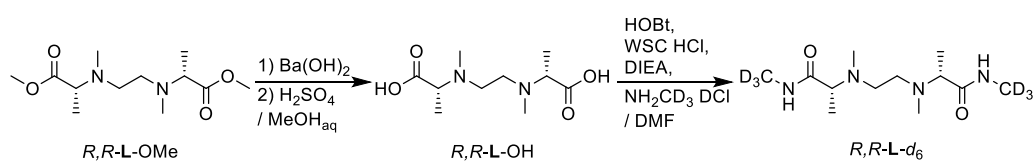

To a solution of  $R,R$ -**L-OMe** (1.03 g, 3.96 mmol) in 5 mL methanol, 0.1 M  $\text{Ba(OH)}_2$  aqueous solution (9.6 mL) was added and the mixture was stirred for 30 min at room temperature. After starting material was disappeared on the TLC (silica gel,  $\text{CH}_3\text{OH}/\text{CHCl}_3 = 1/9$ , v/v), 0.1 M  $\text{H}_2\text{SO}_4$  aqueous solution (8 mL) was added to the solution. The precipitation was removed by filtration and the solution was evaporated. The residue was dried in vacuo to give crude  $R,R$ -**L-OH** (0.93 g).  $R,R$ -**L-OH** was used for next reaction without further purification.

To a solution of *R,R-L-OH* (0.093 g, 0.401 mmol), HOBt (0.108 g, 0.802 mmol) and DIEA (0.184 g, 1.60 mmol) in 10 mL DMF, WSC hydrochloride (0.153 g, 0.801 mmol) in 6 mL DMF was added in 3 portions every 5 min and the solution was stirred for 30 min in an ice bath.  $\text{NH}_2\text{CD}_3$  deuteriumchloride (0.054 g, 0.802 mmol) was added to the solution and the mixture was stirred overnight in a water bath. The product was extracted with chloroform and the organic phase was washed 3 times with saturated  $\text{NaHCO}_3$  aqueous solution, and then the organic phase was dried over anhydrous sodium sulfate. The solution was evaporated, and the residue was purified with column chromatography (NH silica gel,  $\text{CH}_3\text{OH}/\text{CHCl}_3 = 1/5$ , v/v) to give colorless oil. The liquid was diluted with diethyl ether and the solution was evaporated. This operation repeated several times to give a white solid. The solid was washed with diethyl ether chilled in refrigerator and dried in vacuo to give *R,R-L-d<sub>6</sub>* (0.036 g, 34.8%).  $\delta\text{H}$  (270 MHz,  $\text{CDCl}_3$ ) 7.87 (bs, 2H,  $\text{NH}$ ) 3.29 (q, 2H,  $J = 7.1$ , Ala- $\text{H}$ ), 2.56 (d, 2H,  $J = 9.1$ , ethylene), 2.30 (s, 6H, N- $\text{CH}_3$ ), 2.27 (d, 2H,  $J = 9.1$  Hz, ethylene), 1.27 (d, 6H,  $J = 7.1$  Hz, Ala- $\text{CH}_3$ );  $\delta\text{C}$  (67.5 MHz,  $\text{CDCl}_3$ ) 9.67, 39.9, 51.1, 63.9, 76.6, 174.1;  $\nu_{\text{max}}(\text{KBr})/\text{cm}^{-1}$  3300, 2979, 1655, 1522, 1365, 1213, 1115; Found: C, 53.9; H, 10.01; N, 21.0; calculated for  $\text{C}_{12}\text{H}_{20}\text{D}_6\text{N}_4\text{O}_2$  C, 54.5; H, 7.62; D, 4.57; N, 21.2; HRMS (ESI) calculated for  $\text{C}_{12}\text{H}_{20}\text{D}_6\text{N}_4\text{O}_2$   $[\text{M} + \text{Na}]^+$  for  $m/z$  287.2330, found  $m/z$  287.2372;  $[\alpha]^{26.5}_{\text{D}} -23.3$  ( $c$  0.100, MeOH); mp 87.9 °C.

The presence of deuterium affects the elemental analysis of hydrogen. The hydrogen and deuterium contents were corrected by the following formula from the observed hydrogen value.<sup>S5</sup>

$$\begin{aligned} \text{H (\%)} &= \text{observed H value (\%)} \times \text{number of H} / (\text{number of H} + \text{number of D} \times 1.028) \\ &= 10.01 \times 20 / (20 + 6 \times 1.028) \\ &= 7.65 (\%) \end{aligned}$$

$$\begin{aligned} \text{D (\%)} &= \text{observed H value (\%)} \times \text{number of D} \times \{1.028 / (\text{number of H} + \text{number of D} \times 1.028)\} \times \\ &1.944 \\ &= 10.01 \times 6 \times \{1.028 / (20 + 6 \times 1.028)\} \times 1.944 \\ &= 4.59 (\%) \end{aligned}$$

### 3. Mass spectrometry

The machine condition of ESI mass spectra (positive ion mode) with a JEOL AccuTOF LC-plus JMS-T 100LP mass spectrometer was optimized to detect such metal complex ions with high sensitivity as follows; voltage of spray needle = 2.5 kV, orifice1 = 40 V, orifice2 = 1 V, ring lens = 15 V, temperature of desolvation chamber = 100 °C, temperature of orifice1 = 50 °C, mass range =  $m/z$  150-1000. The mass spectrum data was collected as the following condition: acquisition time = 0.497 s, wait time = 0.003 s (= single scan time = 0.500 s), measurement time = 2 min for 240 scans.

The accuracy of the 1:1 equivalent of the  $\text{Cu}^{\text{II}}/\text{S,S-L}$  and  $\text{Cu}^{\text{II}}/\text{R,R-L-d}_6$  was calibrated on basis of the relative peak intensity ( $IR/IS$  values) of the complex ions,  $[\text{Cu}^{\text{II}}(\text{R,R-L-d}_6)(\text{Gly} - \text{H})]^+$  and  $[\text{Cu}^{\text{II}}(\text{S,S-L})]^+$ .

$L)(Gly - H)]^+$ , obtained by adding glycine (Gly).

#### 4. Sample preparation

Host solution is prepared by following procedure; 1.20 mL of *S,S-L* and *R,R-L-d<sub>6</sub>* ( $1.00 \times 10^{-3}$  M each) in methanol and 1.00 mL of copper(II) chloride ( $2.00 \times 10^{-3}$  M) in methanol were mixed which was diluted to 20 mL by adding methanol. When the sample solution is prepared at a concentration lower than the follows and the mass spectrum is measured, the contribution of noise to the peak intensity value becomes large not to determine the *ee* of AA. Therefore, the following preparation conditions were adopted.

Single analysis sample solution is prepared by following procedure; 1.00 mL of host solution and 0.01 mL of equimolar mixture of *S-AA* ( $1.00 \times 10^{-3}$  M each) containing  $K_2CO_3$  (equimolar for carboxyl group of AA) in water were mixed for the solution of mass measurements (mole ratio:  $CuCl_2/S,S-L/R,R-L-d_6/S-AA = 1.0/0.6/0.6/0.1$ ). In the case adding *S-Asp*, *S-Glu*, *S-Lys* and *S-Ser*, 1.00 mL of host solution and 0.05 mL of equimolar mixture of *S-AA* ( $1.00 \times 10^{-3}$  M each) containing  $K_2CO_3$  (equimolar for carboxyl group of AA) in water were mixed for the solution of mass measurements (mole ratio:  $CuCl_2/S,S-L/R,R-L-d_6/S-AA = 1.0/0.6/0.6/0.5$ ).

Simultaneous analysis sample solution is prepared by following procedure; 1.00 mL of host solution and 0.15 mL of 16 AAs mixture (*S-Ala*, *S-Asn*, *S-Gln*, *S-His*, *S-Hyp*, *S-Ile*, *S-Leu*, *S-Met*, *S-Phe*, *S-Phe*, *S-Pro*, *S-Thr*, *S-Tle*, *S-Trp*, *S-Tyr*, *S-Val*, *S-Arg*, *S-Asp*, *S-Glu*, *S-Lys*, and *S-Ser*,  $1.00 \times 10^{-3}$  M each) containing  $K_2CO_3$  (equimolar for carboxyl group of AA) in water were mixed for the solution of mass measurements (mole ratio:  $CuCl_2/S,S-L/R,R-L-d_6/AA(total) = 1.0/0.6/0.6/1.5$ ).

Under the optimized preparation conditions, equivalents of the AAs to the copper complex are high (1.5) and it does not appear to be a competitive condition. However, when the concentration is small (*ca.*  $10^{-5}$  M), the association constants are small, which may be a competitive condition. As shown in Figure S8, the concentration ratio of the three-component complex ions generated in the three-component complexation equilibrium system changes depending on the association constants ( $K_{SS-S}$  and  $K_{RR-S}$ ) and the values approach the ratio of the association constants ( $K_{SS-S}/K_{RR-S}$ , here, it is assumed at 1.5) under competitive condition. When the association constants are small ( $K_{SS-S} = 150 \text{ M}^{-1}$ ,  $K_{RR-S} = 100 \text{ M}^{-1}$ ), it becomes a competitive condition even if the amino acid is excessive (dotted line B) and the concentration ratio of the three-component complex ions is almost maintained. Indeed the *I<sub>e</sub>* value was maintained even when equivalent of AAs was actually changed from 0.5 eq. to 1.5 eq. shown in

Figure S9. This suggests that the association constants ( $K_{SS-S}$  and  $K_{RR-S}$ ) of this complexation equilibrium system are about  $100 \text{ M}^{-1}$ .

## 5. References

- S1 L. N. Schoenberg, D. W. Cooke and C. F. Liu, *Inorg. Chem.*, 1968, **7**, 2386–2393.
- S2 H. Miyake, K. Yoshida, H. Sugimoto and H. Tsukube, *J. Am. Chem. Soc.*, 2004, **126**, 6524–6525.
- S3 T. Nakakoji, H. Sato, D. Ono, H. Miyake, S. Shinoda, H. Tsukube, H. Kawasaki, R. Arakawa and M. Shizuma, *Chem. Commun.*, 2020, **56**, 54–57.
- S4 H. Miyake, H. Kamon, I. Miyahara, H. Sugimoto and H. Tsukube, *J. Am. Chem. Soc.*, 2008, **130**, 792–793.
- S5 M. Okumiya, in the abstract book of 19<sup>th</sup> *The mini-salon of organic micro analysis*. 1998.

## 6. Figures

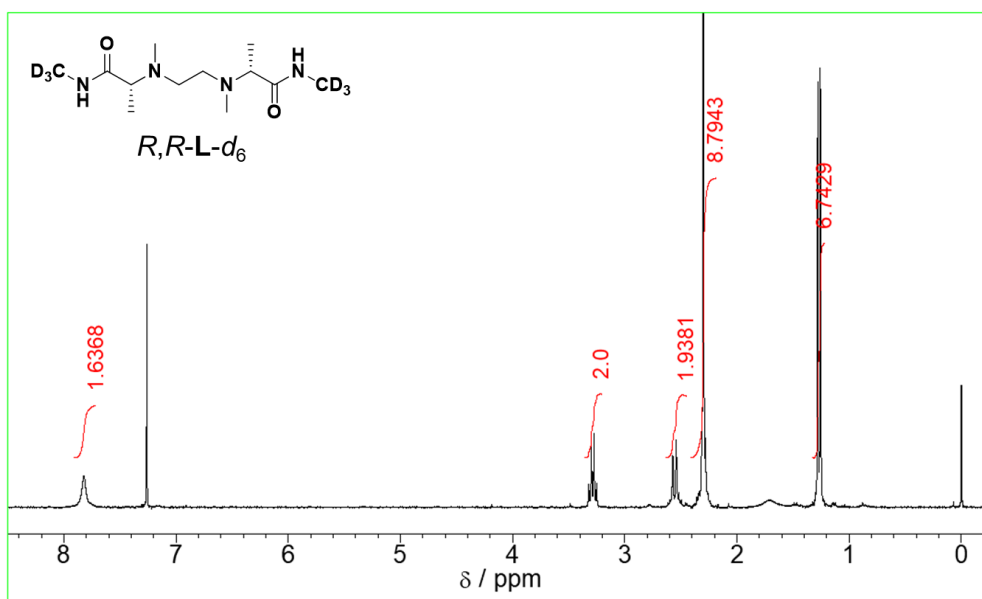

Figure S1.  $^1\text{H-NMR}$  spectrum of  $R,R\text{-L-d}_6$

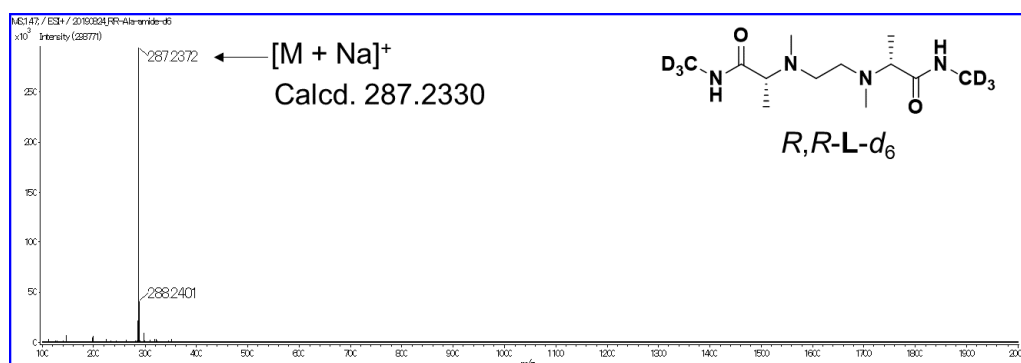

Figure S2. HR mass spectrum of  $R,R\text{-L-d}_6$

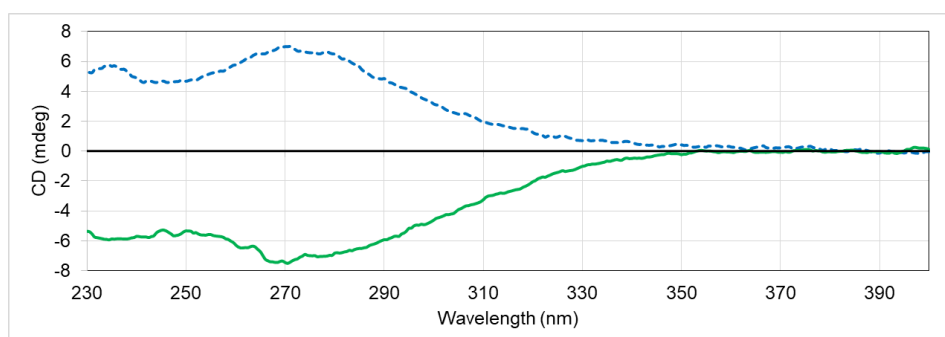

Figure S3. CD spectra of a mixed solution of  $\text{CuCl}_2$  and  $S,S\text{-L}$  (blue dashed line) and mixed solution of  $\text{CuCl}_2$  and  $R,R\text{-L-d}_6$  (green solid line) in methanol.  $[\text{CuCl}_2]_0 = [S,S\text{-L}]_0 = [R,R\text{-L-d}_6]_0 = 1.0 \times 10^{-4}$  M.

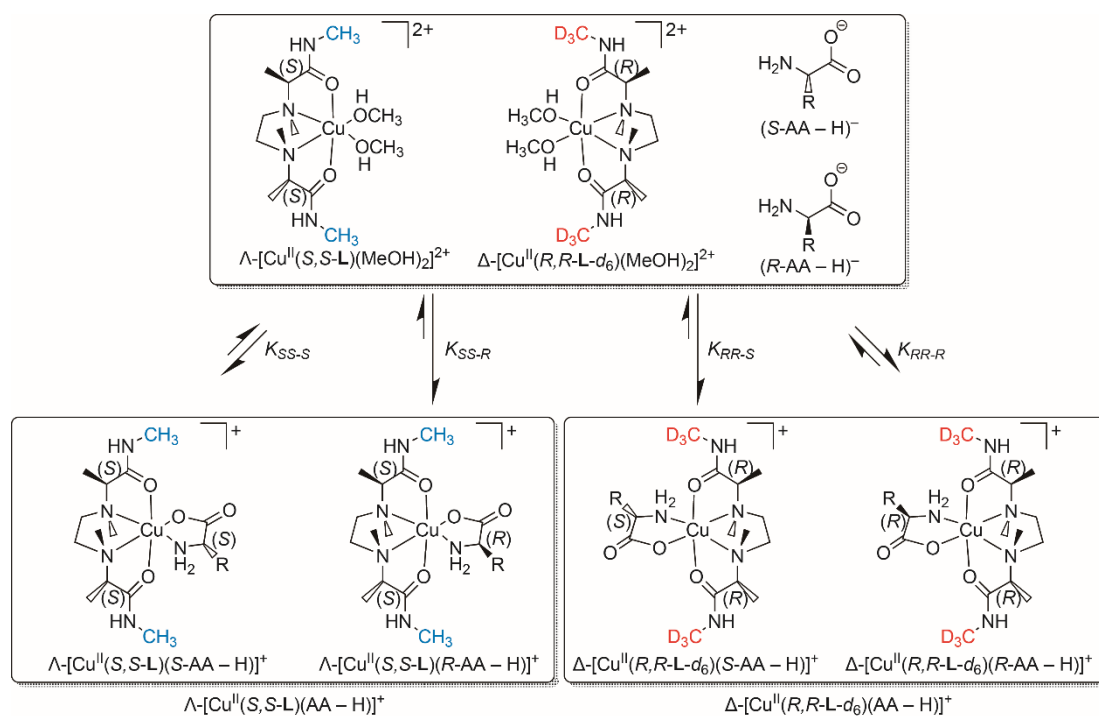

**Figure S4.** Formation of three-component complexes in a system of  $\text{CuCl}_2/\text{S,S-L}/\text{R,R-L-}d_6/\text{S-AA}/\text{R-AA}$ .

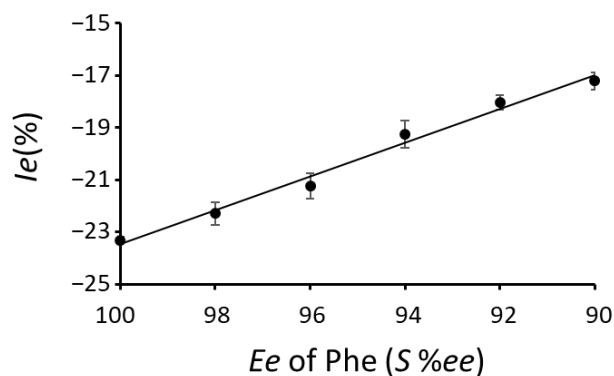

**Figure S5.** Correlation between  $I_e$  values of  $[\text{Cu}^{\text{II}}(\text{S,S-L})(\text{Phe-H})]^+$  and  $[\text{Cu}^{\text{II}}(\text{R,R-L-}d_6)(\text{Phe-H})]^+$  in mass spectra using S90–100 %ee of Phe.  $[\text{CuCl}_2]_0 = 9.90 \times 10^{-5}$  M,  $[\text{S,S-L}]_0 = [\text{R,R-L-}d_6]_0 = 5.94 \times 10^{-5}$  M, and  $[\text{Phe}]_0 = [\text{K}_2\text{CO}_3]_0 = 9.90 \times 10^{-6}$  M.  $[\text{CuCl}_2]_0/[\text{S,S-L}]_0/[\text{R,R-L-}d_6]_0/[\text{Phe}]_0 = 1.0/0.6/0.6/0.1$ .

(a)

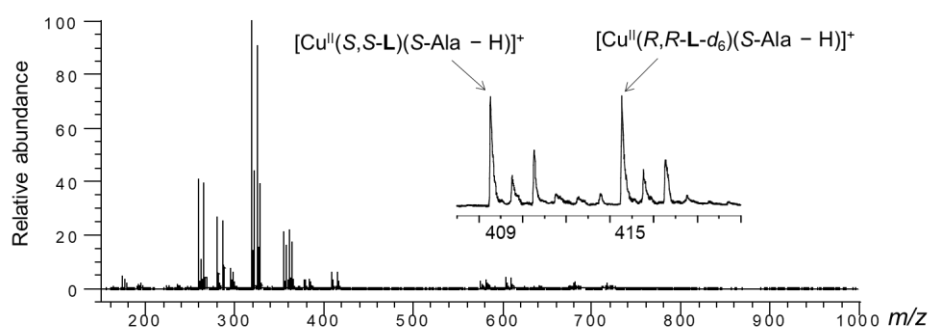

(b)

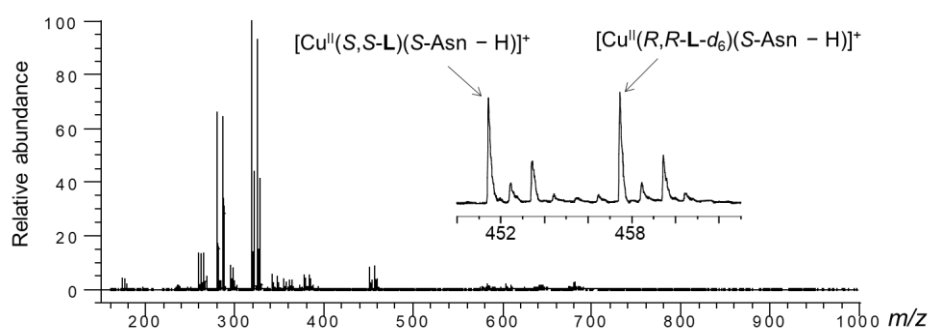

(c)

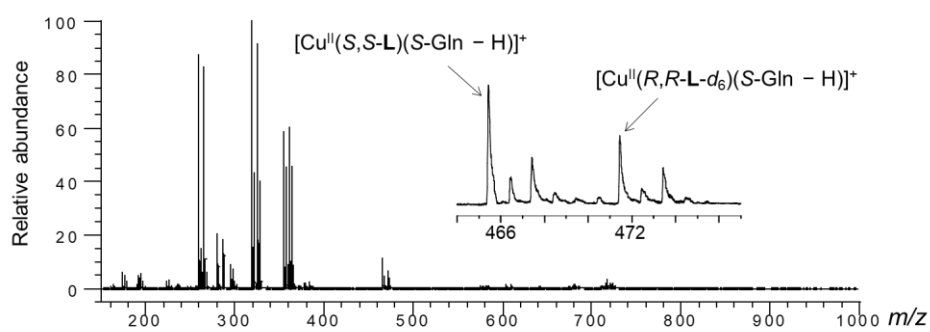

**Figure S6.** Mass spectra of a mixture of  $\text{Cu}^{\text{II}}/S,S\text{-L}/R,R\text{-L-}d_6/S\text{-AA}$  in water/methanol (1/100, v/v).  $[\text{CuCl}_2]_0 = 9.90 \times 10^{-5}$  M,  $[S,S\text{-L}]_0 = [R,R\text{-L-}d_6]_0 = 5.94 \times 10^{-5}$  M and  $[S\text{-AA}]_0 = [\text{K}_2\text{CO}_3]_0 = 9.90 \times 10^{-6}$  M.  $[\text{CuCl}_2]_0/[S,S\text{-L}]_0/[R,R\text{-L-}d_6]_0/[S\text{-AA}]_0 = 1.0/0.6/0.6/0.1$ . AA = (a) Ala, (b) Asn and (c) Gln.



(d)

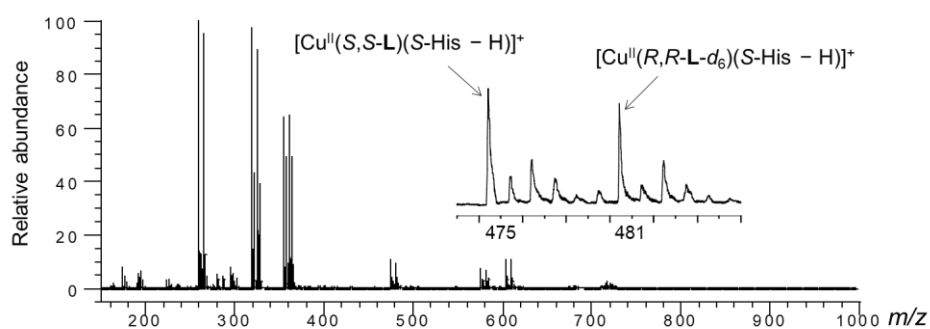

(e)

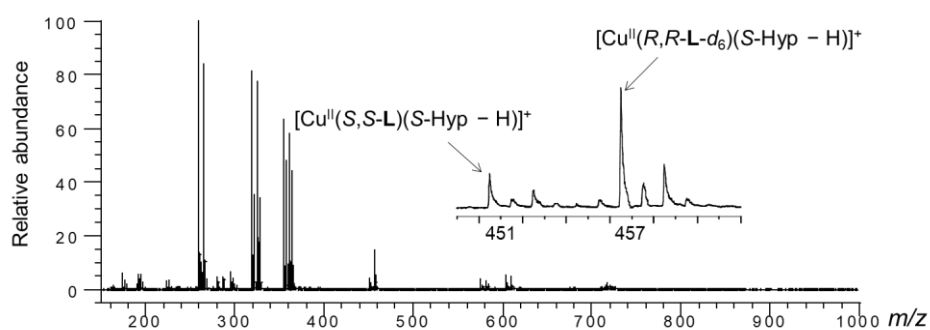

(f)

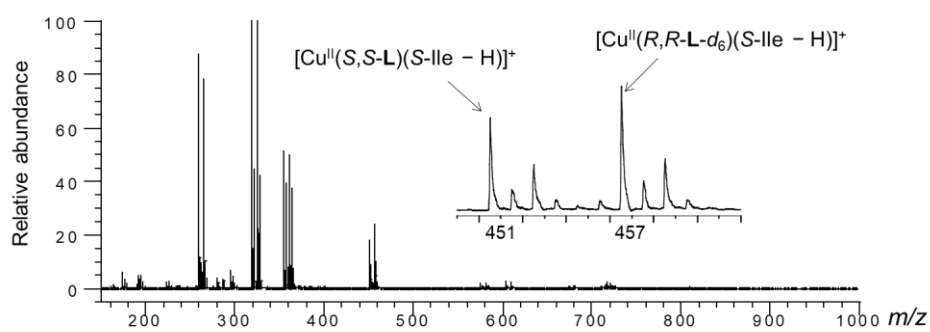

**Figure S6.** (continued). Mass spectra of a mixture of  $\text{Cu}^{\text{II}}/\text{S,S-L}/\text{R,R-L-}d_6/\text{S-AA}$  in water/methanol (1/100, v/v).  $[\text{CuCl}_2]_0 = 9.90 \times 10^{-5} \text{ M}$ ,  $[\text{S,S-L}]_0 = [\text{R,R-L-}d_6]_0 = 5.94 \times 10^{-5} \text{ M}$  and  $[\text{S-AA}]_0 = [\text{K}_2\text{CO}_3]_0 = 9.90 \times 10^{-6} \text{ M}$ .  $[\text{CuCl}_2]_0/[\text{S,S-L}]_0/[\text{R,R-L-}d_6]_0/[\text{S-AA}]_0 = 1.0/0.6/0.6/0.1$ . AA = (d) His, (e) Hyp and (f) Ile.

(g)

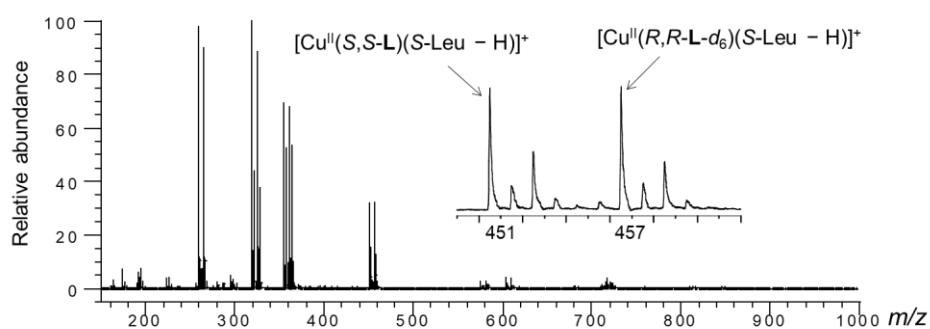

(h)

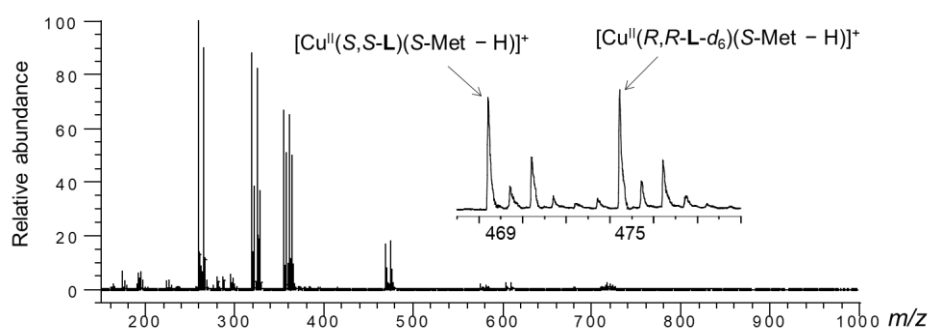

(i)

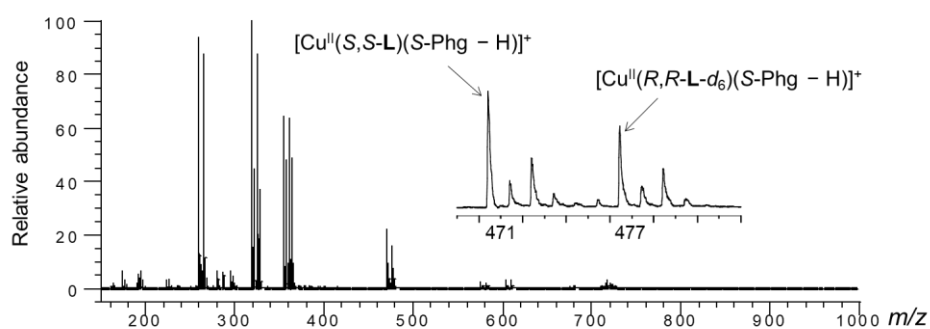

**Figure S6.** (continued). Mass spectra of a mixture of  $\text{Cu}^{\text{II}}/\text{S,S-L}/\text{R,R-L-}d_6/\text{S-AA}$  in water/methanol (1/100, v/v).  $[\text{CuCl}_2]_0 = 9.90 \times 10^{-5}$  M,  $[\text{S,S-L}]_0 = [\text{R,R-L-}d_6]_0 = 5.94 \times 10^{-5}$  M and  $[\text{S-AA}]_0 = [\text{K}_2\text{CO}_3]_0 = 9.90 \times 10^{-6}$  M.  $[\text{CuCl}_2]_0/[\text{S,S-L}]_0/[\text{R,R-L-}d_6]_0/[\text{S-AA}]_0 = 1.0/0.6/0.6/0.1$ . AA = (g) Leu, (h) Met and (i) Phg.

(j)

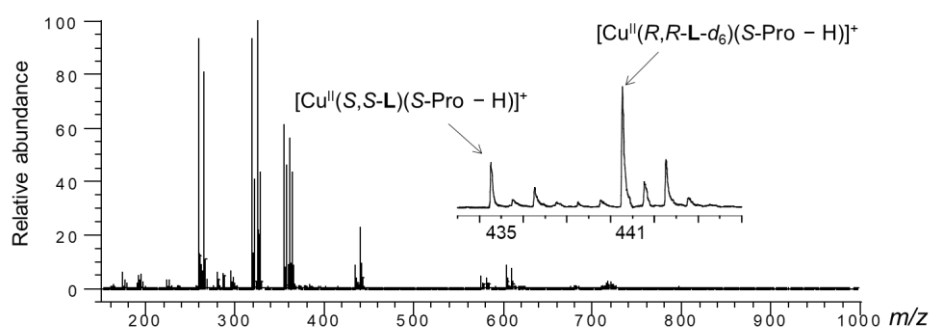

(k)

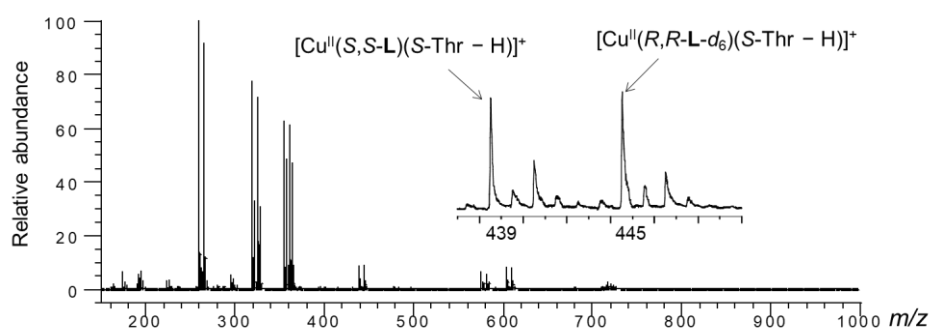

(l)

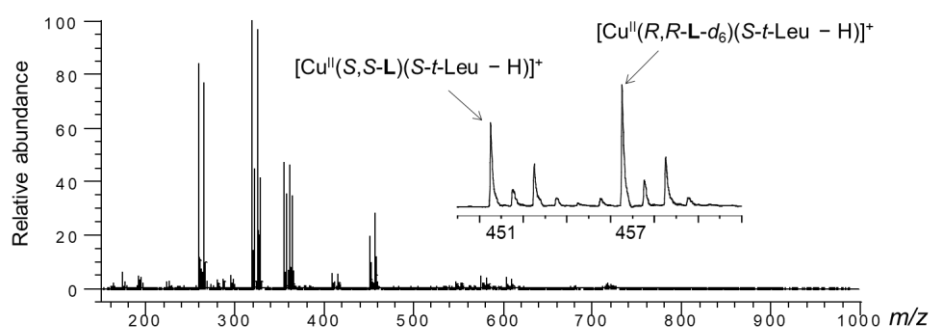

**Figure S6.** (continued). Mass spectra of a mixture of  $\text{Cu}^{\text{II}}/\text{S,S-L}/\text{R,R-L-}d_6/\text{S-AA}$  in water/methanol (1/100, v/v).  $[\text{CuCl}_2]_0 = 9.90 \times 10^{-5} \text{ M}$ ,  $[\text{S,S-L}]_0 = [\text{R,R-L-}d_6]_0 = 5.94 \times 10^{-5} \text{ M}$  and  $[\text{S-AA}]_0 = [\text{K}_2\text{CO}_3]_0 = 9.90 \times 10^{-6} \text{ M}$ .  $[\text{CuCl}_2]_0/[\text{S,S-L}]_0/[\text{R,R-L-}d_6]_0/[\text{S-AA}]_0 = 1.0/0.6/0.6/0.1$ . AA = (j) Pro, (k) Thr and (l) *t*-Leu.

(m)

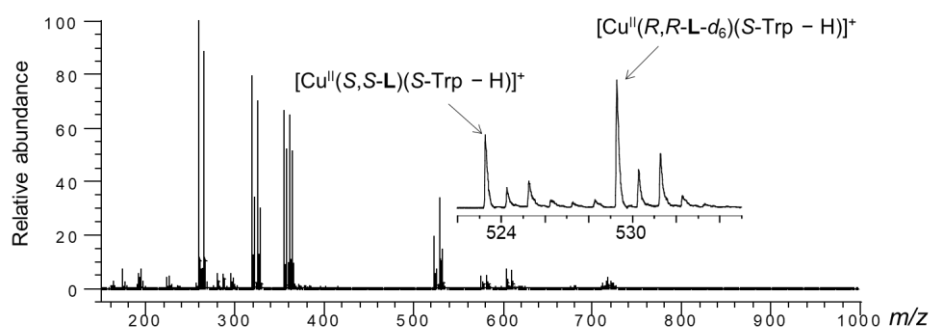

(n)

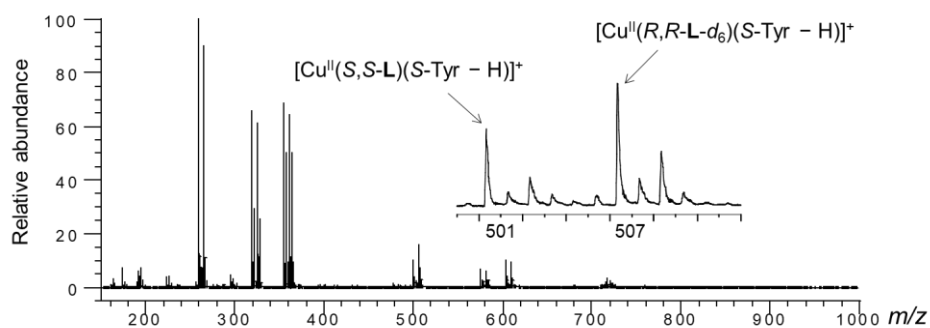

(p)

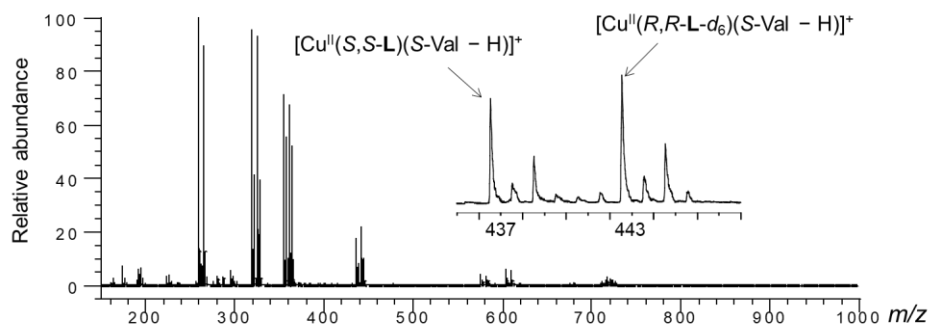

**Figure S6.** (continued). Mass spectra of a mixture of  $\text{Cu}^{\text{II}}/S,S\text{-L}/R,R\text{-L-}d_6/S\text{-AA}$  in water/methanol (1/100, v/v).  $[\text{CuCl}_2]_0 = 9.90 \times 10^{-5} \text{ M}$ ,  $[S,S\text{-L}]_0 = [R,R\text{-L-}d_6]_0 = 5.94 \times 10^{-5} \text{ M}$  and  $[S\text{-AA}]_0 = [\text{K}_2\text{CO}_3]_0 = 9.90 \times 10^{-6} \text{ M}$ .  $[\text{CuCl}_2]_0/[S,S\text{-L}]_0/[R,R\text{-L-}d_6]_0/[S\text{-AA}]_0 = 1.0/0.6/0.6/0.1$ . AA = (m) Trp, (n) Tyr and (p) Val.

(a)

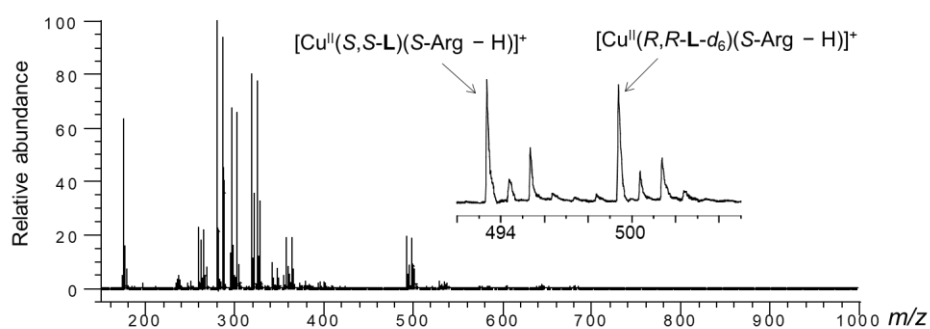

(b)

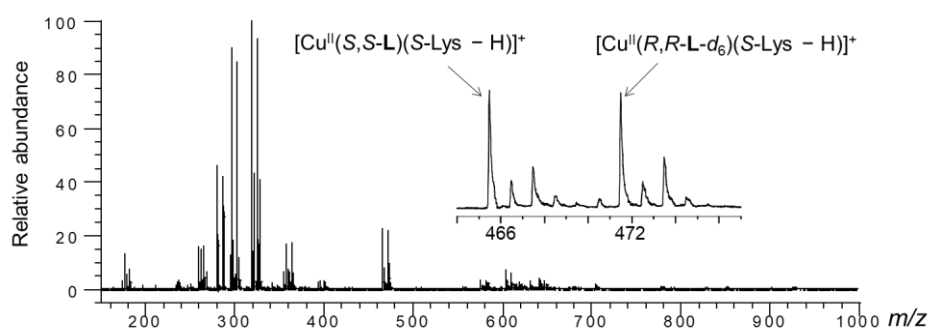

(c)

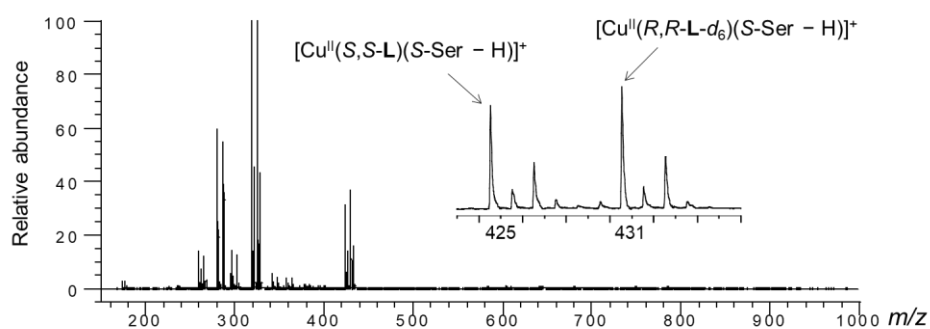

**Figure S7.** Mass spectra of a mixture of  $\text{Cu}^{\text{II}}/\text{S,S-L}/\text{R,R-L-}d_6/\text{S-AA}$  in water/methanol (1/20, v/v).  $[\text{CuCl}_2]_0 = 9.52 \times 10^{-5} \text{ M}$ ,  $[\text{S,S-L}]_0 = [\text{R,R-L-}d_6]_0 = 5.71 \times 10^{-5} \text{ M}$  and  $[\text{S-AA}]_0 = [\text{K}_2\text{CO}_3]_0 = 4.76 \times 10^{-5} \text{ M}$ .  $[\text{CuCl}_2]_0/[\text{S,S-L}]_0/[\text{R,R-L-}d_6]_0/[\text{S-AA}]_0 = 1.0/0.6/0.6/0.5$ . AA = (a) Arg, (b) Lys and (c) Ser.

(d)

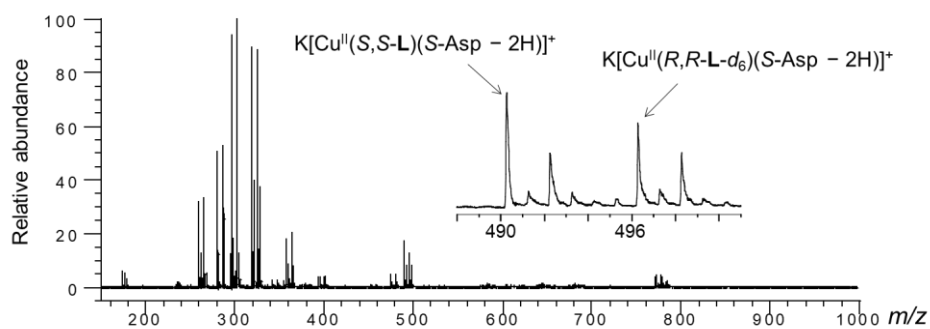

(e)

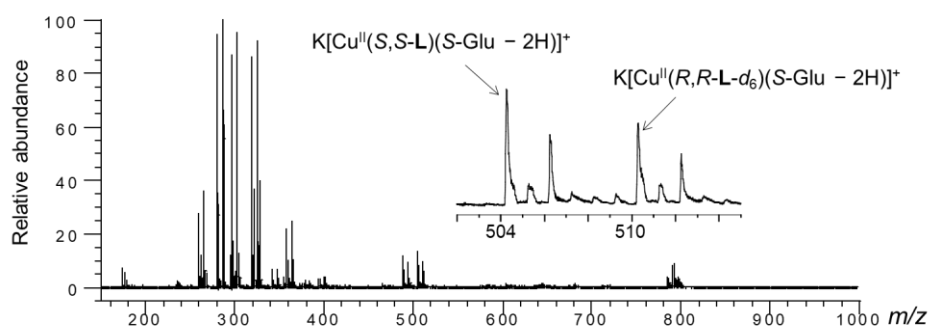

**Figure S7.** (continued). Mass spectra of a mixture of  $\text{Cu}^{\text{II}}/\text{S,S-L}/\text{R,R-L-}d_6/\text{S-AA}$  in water/methanol (1/20, v/v).  $[\text{CuCl}_2]_0 = 9.52 \times 10^{-5} \text{ M}$ ,  $[\text{S,S-L}]_0 = [\text{R,R-L-}d_6]_0 = 5.71 \times 10^{-5} \text{ M}$ ,  $[\text{S-AA}]_0 = [\text{K}_2\text{CO}_3]_0 = 4.76 \times 10^{-5} \text{ M}$ .  $[\text{CuCl}_2]_0/[\text{S,S-L}]_0/[\text{R,R-L-}d_6]_0/[\text{S-AA}]_0 = 1.0/0.6/0.6/0.5$ . AA = (d) Asp and (e) Glu.

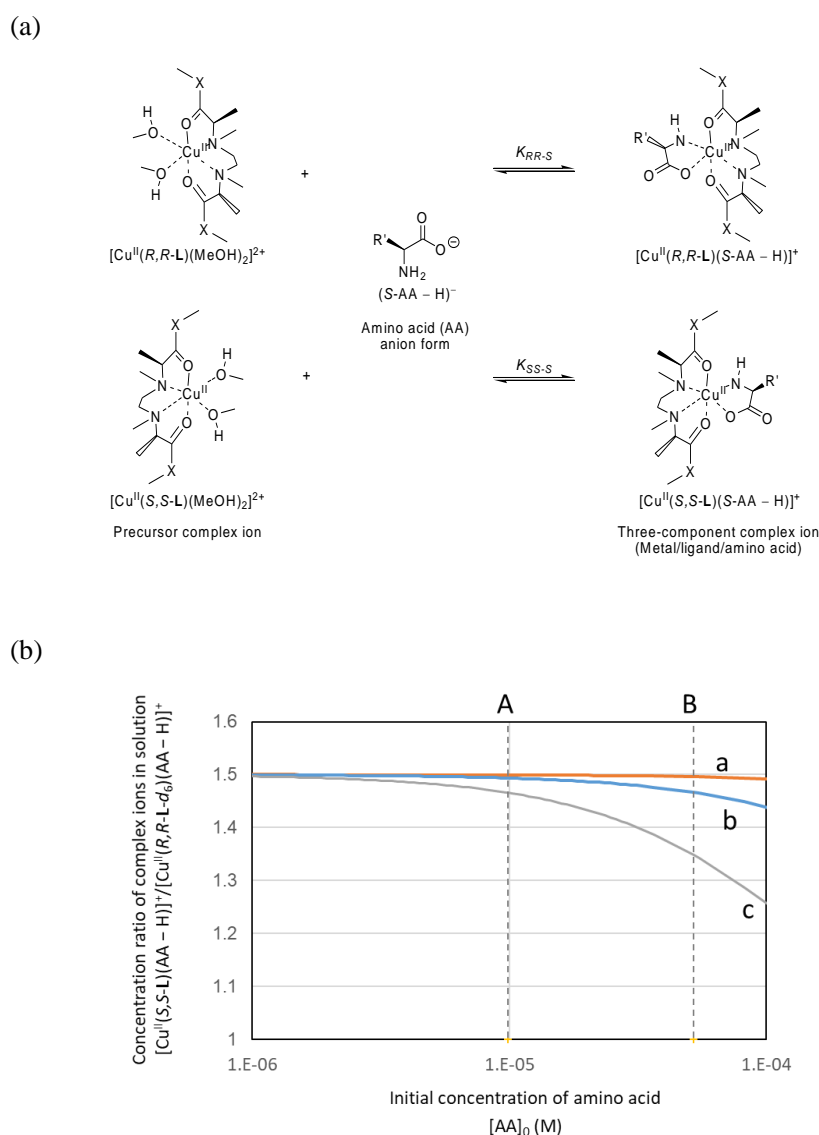

**Figure S8.** Enantioselective three-component complexation equilibrium system and plots of the calculated concentration ratio of the diastereomeric complex ions,  $[\text{Cu}^{\text{II}}(\text{S,S-L})(\text{S-AA-H})^+]/[\text{Cu}^{\text{II}}(\text{R,R-L})(\text{S-AA-H})^+]$ , in solution (line) versus the initial concentration of  $[\text{AA}]_0$  in solution. (a) Enantioselective complexation equilibrium system of enantiomeric pair of the precursor complex ions with AA (anion form), (b) plots of  $[\text{Cu}^{\text{II}}(\text{S,S-L})(\text{S-AA-H})^+]/[\text{Cu}^{\text{II}}(\text{R,R-L})(\text{S-AA-H})^+]$  vs  $[\text{AA}]_0$  (the initial concentration of the precursor complex ions  $[\text{Cu}^{\text{II}}(\text{S,S-L})(\text{CH}_3\text{OH})_2^{2+}]_0 = [\text{Cu}^{\text{II}}(\text{S,S-L})(\text{CH}_3\text{OH})_2^{2+}]_0 = 4.95 \times 10^{-5}$  M). In the calculation, the ratio of the association constants was assumed to be constant ( $K_{RR-S}/K_{SS-S} = 1.50$ ). Line a,  $K_{RR-S} = 150 \text{ M}^{-1}$ ,  $K_{SS-S} = 100 \text{ M}^{-1}$ ; line b,  $K_{RR-S} = 1500 \text{ M}^{-1}$ ,  $K_{SS-S} = 1000 \text{ M}^{-1}$ ; line c,  $K_{RR-S} = 15000 \text{ M}^{-1}$ ,  $K_{SS-S} = 10000 \text{ M}^{-1}$ . Dotted line A, a condition of single AA analysis shown in Table; dotted line B, condition of simultaneous AA analysis shown in Figs. 5 and 6.

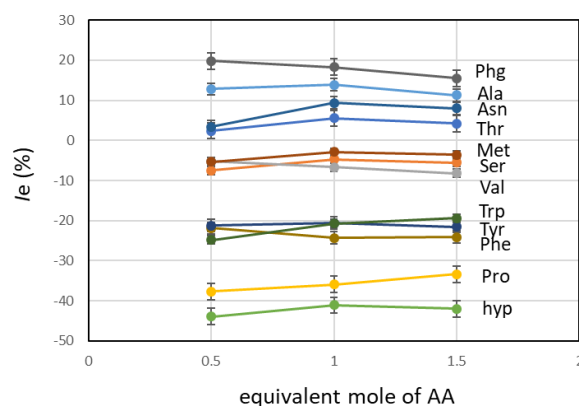

**Figure S9.**  $I_e$  (%) value of the simultaneous analysis against equivalent mole of AA for  $\text{CuCl}_2$  and ligands ( $S,S\text{-L}$ ,  $R,R\text{-L-}d_6$ ).  $[\text{CuCl}_2]_0 = 8.70 \times 10^{-5}$  M.  $[\text{CuCl}_2]_0/[\text{S,S-L}]_0/[\text{R,R-L-}d_6]_0/[\text{S-AA (total)}]_0/[\text{K}_2\text{CO}_3]_0 = 1.0/0.6/0.6/x/4x$  ( $x = 0.5, 1.0, \text{ or } 1.5$ ).

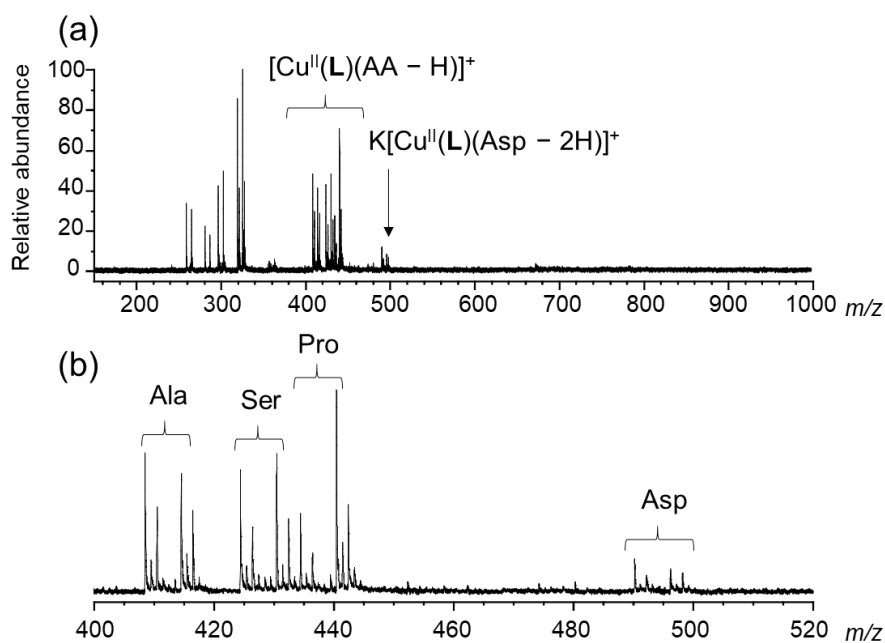

**Figure S10.** Mass spectra of a mixture of  $\text{Cu}^{\text{II}}/S,S\text{-L}/R,R\text{-L-}d_6/S\text{-AA}$  in water/methanol (3/20, v/v). (a) Full mass range. (b) Enlarged view (mass range:  $m/z$  400-520) of mass spectra of a mixture of  $\text{Cu}^{\text{II}}/S,S\text{-L}/R,R\text{-L-}d_6/S\text{-AA}$ .  $S\text{-AA}$  is mixture of  $S\text{-Ala}$ ,  $S\text{-Asp}$ ,  $S\text{-Pro}$  and  $S\text{-Ser}$ .  $[\text{CuCl}_2]_0 = 8.70 \times 10^{-5}$  M,  $[\text{S,S-L}]_0 = [\text{R,R-L-}d_6]_0 = 5.22 \times 10^{-5}$  M,  $[\text{S-AA (each)}]_0 = 3.24 \times 10^{-5}$  M and  $[\text{K}_2\text{CO}_3]_0 = 1.30 \times 10^{-4}$  M.  $[\text{CuCl}_2]_0/[\text{S,S-L}]_0/[\text{R,R-L-}d_6]_0/[\text{S-AA (total)}]_0 = 1.0/0.6/0.6/0.37$ .
